# Supplementary material for: Achieving higher thermoelectric performance of n-type PbTe by adjusting the band structure and enhanced phonon scattering
Source: Royal Society of Chemistry journal article supplement (doi:10.1039/d2nr04419f), 2022-01-01
Supplement: d2nr04419f1.pdf [file d2nr04419f1.pdf]

## Supporting Information for

### Achieving higher thermoelectric performance of n-type PbTe by adjusting band structure and enhanced phonons scattering

Wei Wu<sup>1,2</sup>, Chen Zhu<sup>1,2</sup>, Hongwei Ming<sup>1,2</sup>, Tao Chen<sup>1,2</sup>, Di Li<sup>1,2,\*</sup>, Xiaoying Qing<sup>1,2,\*</sup>, Jian Zhang<sup>1,2,\*</sup>

<sup>1</sup>Key Lab of Photovoltaic and Energy Conservation Materials, Institute of Solid State Physics, HFIPS, Chinese Academy of Sciences, Hefei 230031, P. R. China.

<sup>2</sup>University of Science and Technology of China, Hefei 230026, China.

\*Corresponding author

E-mail address: [zhangjian@issp.ac.cn](mailto:zhangjian@issp.ac.cn) (Jian Zhang), [xyqin@issp.ac.cn](mailto:xyqin@issp.ac.cn) (Xiaoying Qin),

[lidi@issp.ac.cn](mailto:lidi@issp.ac.cn) (Di Li)

1. The raw materials, XRD pattern and FE-SEM micrographs for the  $\text{Cu}_{12}\text{Sb}_4\text{S}_{13}$  nanoparticles.

| Raw materials | $\text{SbCl}_3$<br>(99%) | $\text{CuCl}$<br>(97%) | S<br>(99.5%) | ethyl alcohol<br>(99.7%) | anhydrous<br>ethylenediamine<br>(99%) |
|---------------|--------------------------|------------------------|--------------|--------------------------|---------------------------------------|
| Content       | 30mmol                   | 90mmol                 | 97.5mmol     | -                        | -                                     |
| Mass/Volume   | 6.8433g                  | 8.9099g                | 3.1263g      | 50ml                     | 250ml                                 |

**Table S1** Raw materials for synthesizing  $\text{Cu}_{12}\text{Sb}_4\text{S}_{13}$  nanoparticles.

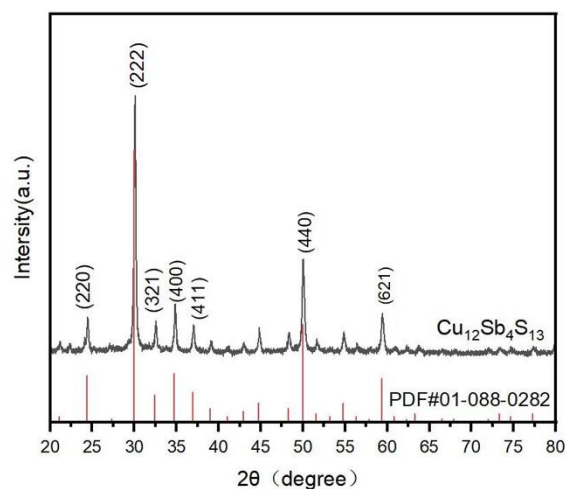

**Figure S1** XRD pattern for  $\text{Cu}_{12}\text{Sb}_4\text{S}_{13}$  nanoparticles.

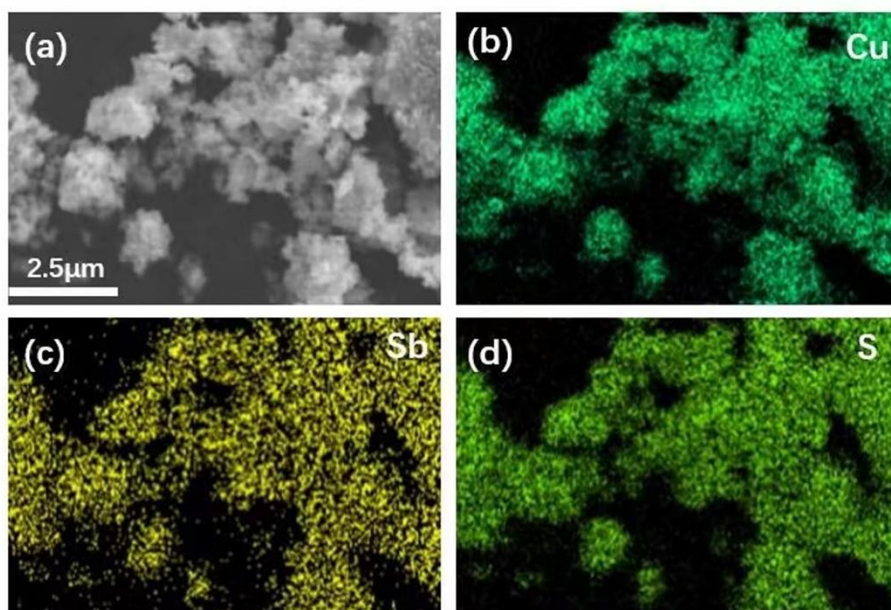

**Figure S2** FE-SEM micrographs of (a) surface of the  $\text{Cu}_{12}\text{Sb}_4\text{S}_{13}$  nanoparticles, and (b)–(d) an

elemental (Cu, Sb and S) mapping.

**2. Theoretical densities, measured densities and relative densities for  $\text{Pb}_{0.97}\text{Sb}_{0.03}\text{Te} + y \text{ wt.}\%$   $\text{Cu}_{12}\text{Sb}_4\text{S}_{13}$  ( $y = 0, 1.25, 1.5, 1.75$ ) samples.**

| Composition | Theoretical density<br>( $\text{g cm}^{-3}$ ) | Measured density<br>( $\text{g cm}^{-3}$ ) | Relative density<br>(%) |
|-------------|-----------------------------------------------|--------------------------------------------|-------------------------|
| y=0         | 7.799                                         | 7.576                                      | 97.1                    |
| y=1.25      | 7.758                                         | 7.556                                      | 97.4                    |
| y=1.5       | 7.748                                         | 7.531                                      | 97.2                    |
| y=1.75      | 7.738                                         | 7.552                                      | 97.6                    |

**Table S2** Theoretical densities, measured densities and relative densities for  $\text{Pb}_{0.97}\text{Sb}_{0.03}\text{Te} + y \text{ wt.}\%$   $\text{Cu}_{12}\text{Sb}_4\text{S}_{13}$  ( $y = 0, 1.25, 1.5, 1.75$ ) samples.

**3. The size distribution histogram of PbTe matrix and CuTe nanoparticles.**

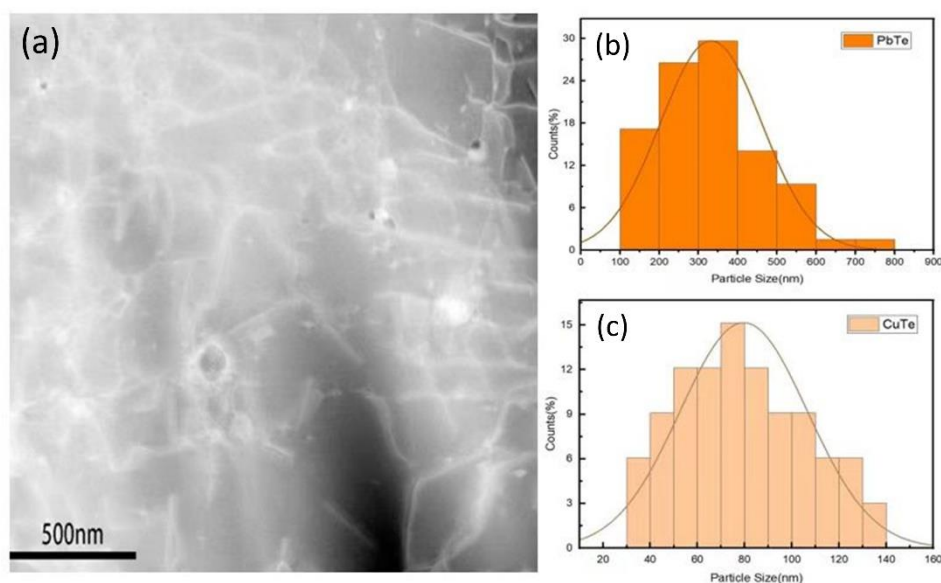

**Figure S3** (a) Low magnification STEM image of  $\text{Pb}_{0.97}\text{Sb}_{0.03}\text{Te} + 1.5 \text{ wt.}\%$   $\text{Cu}_{12}\text{Sb}_4\text{S}_{13}$  composite sample; (b) the size distribution histogram of PbTe matrix; (c) the size distribution histogram of CuTe nanoparticles.
